# Supplementary material for: Reliability evaluation of traditional Chinese medicine fingerprints combined with qualitative and quantitative analysis and antioxidant activity to comprehensively evaluate the quality of Citri Reticulatae Pericarpium
Source: Royal Society of Chemistry journal article supplement (doi:10.1039/d2nj03752a), 2022-01-01
Supplement: d2nj03752a1.pdf [file d2nj03752a1.pdf]

**Reliability evaluation of traditional Chinese medicine fingerprints combined  
with qualitative and quantitative analysis and antioxidant activity to  
comprehensively evaluate the quality of Citri Reticulatae pericarpium**

Xinyi Wang<sup>a</sup>, Qian Chang<sup>a</sup>, Lili Lan<sup>a</sup>, Yong Guo<sup>a</sup>, Guoxiang Sun<sup>a, \*</sup>, Qian Li<sup>b, \*</sup>

<sup>a</sup> College of Pharmacy, Shenyang Pharmaceutical University, Wenhua Road 103, Shenyang, 110016, P. R. China

<sup>b</sup> China Communication Technology (Jiang Men) Corporation, Guangdong, China

---

|                                                                                                                                                                                                                                                                                                                                                                                                                                                      |   |
|------------------------------------------------------------------------------------------------------------------------------------------------------------------------------------------------------------------------------------------------------------------------------------------------------------------------------------------------------------------------------------------------------------------------------------------------------|---|
| <b>1 Supplementary Figures</b> .....                                                                                                                                                                                                                                                                                                                                                                                                                 | 1 |
| <b>Fig.S1</b> Clustering chart of 230 nm wavelength pre-evaluation (A) clustering chart of 254 nm wavelength pre-evaluation (B) clustering chart of 283 nm wavelength pre-evaluation (C) clustering chart of 305 nm wavelength pre-evaluation (D) clustering chart of 327 nm wavelength pre-evaluation (E) clustering chart of CSF pre-evaluation (F) Clustering Chart of UV-SD pre-evaluation (G) Pr% and PA% correlation prediction chart (H)..... | 1 |
| <b>Fig.S2</b> Comparison of quality evaluation grades of different merging points of UV-QTFP<br>.....                                                                                                                                                                                                                                                                                                                                                | 2 |
| <b>2 Supplementary Tables</b> .....                                                                                                                                                                                                                                                                                                                                                                                                                  | 3 |
| <b>Table S1</b> Quality evaluation scale and Reliability classification table.....                                                                                                                                                                                                                                                                                                                                                                   | 3 |
| <b>Table S2</b> Five-wavelength evaluation results by EWRQFM.....                                                                                                                                                                                                                                                                                                                                                                                    | 4 |
| <b>Table S3</b> Reliability evaluation of RFP and 33 33 batches of CRP.....                                                                                                                                                                                                                                                                                                                                                                          | 7 |

## 1 Supplementary Figures

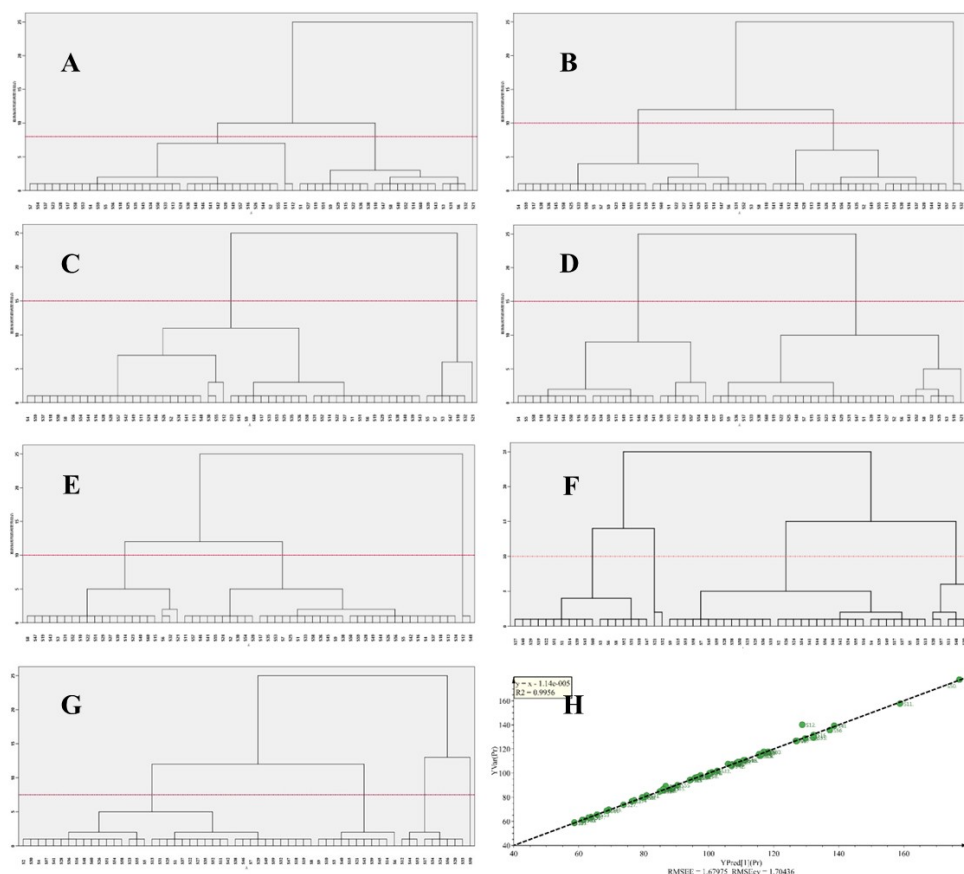

**Fig.S1** Clustering chart of 230 nm wavelength pre-evaluation (A) clustering chart of 254 nm wavelength pre-evaluation (B) clustering chart of 283 nm wavelength pre-evaluation (C) clustering chart of 305 nm wavelength pre-evaluation (D) clustering chart of 327 nm wavelength pre-evaluation (E) clustering chart of CSF pre-evaluation (F) Clustering Chart of UV-SD pre-evaluation (G) Pr% and PA% correlation prediction chart (H)

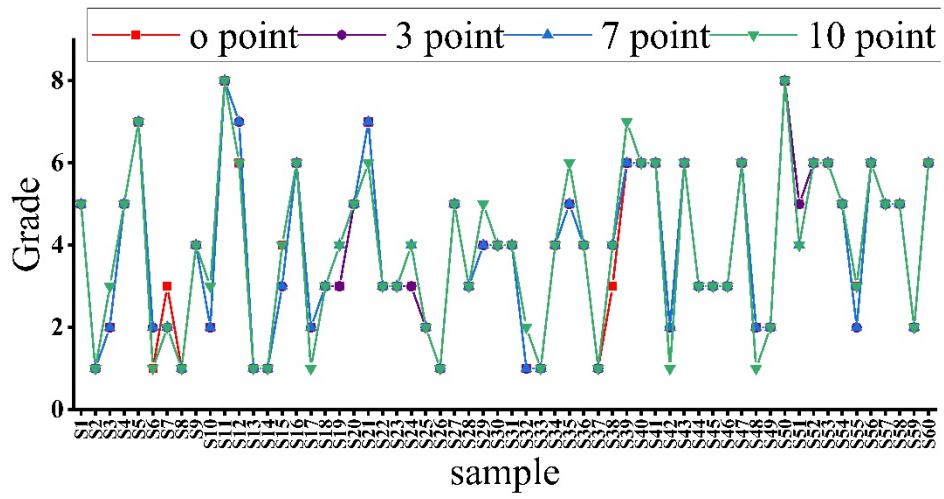

**Fig.S2** Comparison of quality evaluation grades of different merging points of UV-QTFP

## 2 Supplementary Tables

**Table S1** Quality evaluation scale and Reliability classification table

| Quality evaluation scale         |                    |               |             |               |             |             |             |                 |
|----------------------------------|--------------------|---------------|-------------|---------------|-------------|-------------|-------------|-----------------|
| Par.                             | I                  | II            | III         | IV            | V           | VI          | VII         | VIII            |
| Sr                               | $\geq 0.95$        | $\geq 0.90$   | $\geq 0.85$ | $\geq 0.80$   | $\geq 0.70$ | $\geq 0.60$ | $\geq 0.50$ | $\leq 0.50$     |
| Pr                               | 95~105             | 90~110        | 85~115      | 80~120        | 70~130      | 60~140      | 50~150      | 0~ $\infty$     |
| $\alpha$                         | $\leq 0.05$        | $\leq 0.10$   | $\leq 0.15$ | $\leq 0.20$   | $\leq 0.30$ | $\leq 0.40$ | $\leq 0.50$ | $> 0.50$        |
| Quality                          | best               | better        | good        | fine          | moderate    | common      | inferior    | defective       |
| Reliability classification table |                    |               |             |               |             |             |             |                 |
| Par.                             | R1                 | R2            | R3          | R4            | R5          | R6          | R7          | R8              |
| $U_i \leq$                       | 0.05               | 0.1           | 0.15        | 0.2           | 0.3         | 0.4         | 0.5         | $U_i > 0.50$    |
| $R_i \geq$                       | 0.95               | 0.9           | 0.85        | 0.8           | 0.7         | 0.6         | 0.5         | $R_i < 0.50$    |
| Result                           | extremely reliable | very reliable | reliable    | more reliable | moderate    | general     | unreliable  | very unreliable |

**Table S2** Five-wavelength evaluation results by EWRQFM

| Para. | 230nm |       |          | 254nm |       |          | 283nm |       |          | 305nm |       |          | 327nm |       |          | CSF   |       |          |
|-------|-------|-------|----------|-------|-------|----------|-------|-------|----------|-------|-------|----------|-------|-------|----------|-------|-------|----------|
|       | Sr    | Pr%   | $\alpha$ |
| S1    | 0.969 | 75.4  | 0.031    | 0.992 | 91.9  | 0.008    | 0.992 | 91.9  | 0.008    | 0.979 | 93.8  | 0.021    | 0.979 | 80.3  | 0.021    | 0.973 | 81.4  | 0.027    |
| S2    | 0.984 | 99.7  | 0.016    | 0.987 | 114.7 | 0.013    | 0.987 | 114.7 | 0.013    | 0.91  | 97.7  | 0.09     | 0.988 | 106.4 | 0.012    | 0.986 | 103.8 | 0.014    |
| S3    | 0.953 | 63.2  | 0.047    | 0.982 | 76.1  | 0.018    | 0.982 | 76.1  | 0.018    | 0.96  | 75.5  | 0.04     | 0.971 | 64    | 0.029    | 0.963 | 66.4  | 0.037    |
| S4    | 0.984 | 94.4  | 0.016    | 0.988 | 111.2 | 0.012    | 0.988 | 111.2 | 0.012    | 0.987 | 124.6 | 0.013    | 0.982 | 98.8  | 0.018    | 0.979 | 96    | 0.021    |
| S5    | 0.973 | 93.8  | 0.027    | 0.977 | 103.5 | 0.023    | 0.977 | 103.5 | 0.023    | 0.985 | 124.8 | 0.015    | 0.976 | 100.9 | 0.024    | 0.974 | 98.4  | 0.026    |
| S6    | 0.97  | 64.4  | 0.03     | 0.989 | 82.8  | 0.011    | 0.989 | 82.8  | 0.011    | 0.982 | 85.6  | 0.018    | 0.95  | 58    | 0.05     | 0.977 | 66.5  | 0.023    |
| S7    | 0.967 | 88.1  | 0.033    | 0.972 | 103.8 | 0.028    | 0.972 | 103.8 | 0.028    | 0.971 | 101.7 | 0.029    | 0.975 | 81    | 0.025    | 0.973 | 91.2  | 0.027    |
| S8    | 0.967 | 67.2  | 0.033    | 0.99  | 75.5  | 0.01     | 0.99  | 75.5  | 0.01     | 0.996 | 83    | 0.004    | 0.975 | 66.6  | 0.025    | 0.978 | 68.6  | 0.022    |
| S9    | 0.972 | 79.8  | 0.028    | 0.987 | 100.4 | 0.013    | 0.987 | 100.4 | 0.013    | 0.986 | 109.9 | 0.014    | 0.975 | 87.5  | 0.025    | 0.974 | 85.6  | 0.026    |
| S10   | 0.972 | 68.2  | 0.028    | 0.991 | 77.4  | 0.009    | 0.991 | 77.4  | 0.009    | 0.992 | 78.5  | 0.008    | 0.975 | 62.3  | 0.025    | 0.979 | 67.8  | 0.021    |
| S11   | 0.979 | 115.8 | 0.021    | 0.968 | 131.7 | 0.032    | 0.968 | 131.7 | 0.032    | 0.982 | 140.8 | 0.018    | 0.974 | 110.6 | 0.026    | 0.974 | 117.3 | 0.026    |
| S12   | 0.993 | 119.4 | 0.007    | 0.997 | 146.3 | 0.003    | 0.997 | 146.3 | 0.003    | 0.995 | 160.7 | 0.005    | 0.99  | 131.8 | 0.01     | 0.991 | 127   | 0.009    |
| S13   | 0.991 | 97.9  | 0.009    | 0.988 | 122.9 | 0.012    | 0.988 | 122.9 | 0.012    | 0.993 | 135.2 | 0.007    | 0.994 | 96.2  | 0.006    | 0.994 | 100.7 | 0.006    |
| S14   | 0.965 | 71.6  | 0.035    | 0.972 | 84.3  | 0.028    | 0.972 | 84.3  | 0.028    | 0.979 | 96.8  | 0.021    | 0.977 | 75.8  | 0.023    | 0.973 | 76.3  | 0.027    |
| S15   | 0.97  | 80.3  | 0.03     | 0.983 | 101.3 | 0.017    | 0.983 | 101.3 | 0.017    | 0.983 | 102.8 | 0.017    | 0.971 | 78.5  | 0.029    | 0.977 | 85.3  | 0.023    |
| S16   | 0.986 | 103.1 | 0.014    | 0.987 | 127.9 | 0.013    | 0.987 | 127.9 | 0.013    | 0.992 | 130.5 | 0.008    | 0.985 | 101.5 | 0.015    | 0.989 | 105.6 | 0.011    |
| S17   | 0.974 | 86.4  | 0.026    | 0.984 | 108.3 | 0.016    | 0.984 | 108.3 | 0.016    | 0.982 | 111.8 | 0.018    | 0.976 | 82.9  | 0.024    | 0.979 | 93.6  | 0.021    |
| S18   | 0.972 | 93.1  | 0.028    | 0.98  | 122.6 | 0.02     | 0.98  | 122.6 | 0.02     | 0.979 | 122.3 | 0.021    | 0.99  | 98    | 0.01     | 0.976 | 97.5  | 0.024    |
| S19   | 0.961 | 76.6  | 0.039    | 0.982 | 88.8  | 0.018    | 0.982 | 88.8  | 0.018    | 0.988 | 100.8 | 0.012    | 0.975 | 65.7  | 0.025    | 0.978 | 80.2  | 0.022    |
| S20   | 0.986 | 102.8 | 0.014    | 0.993 | 129.4 | 0.007    | 0.993 | 129.4 | 0.007    | 0.996 | 147.6 | 0.004    | 0.99  | 116.5 | 0.01     | 0.987 | 110.3 | 0.013    |
| S21   | 0.904 | 46.5  | 0.096    | 0.968 | 54    | 0.032    | 0.968 | 54    | 0.032    | 0.978 | 61    | 0.022    | 0.965 | 44.6  | 0.035    | 0.937 | 50.6  | 0.063    |

|     |       |       |       |       |       |       |       |       |       |       |       |       |       |       |       |       |       |       |
|-----|-------|-------|-------|-------|-------|-------|-------|-------|-------|-------|-------|-------|-------|-------|-------|-------|-------|-------|
| S22 | 0.984 | 81    | 0.016 | 0.991 | 91.3  | 0.009 | 0.991 | 91.3  | 0.009 | 0.993 | 100.2 | 0.007 | 0.992 | 71.8  | 0.008 | 0.988 | 80    | 0.012 |
| S23 | 0.965 | 87.6  | 0.035 | 0.987 | 100   | 0.013 | 0.987 | 100   | 0.013 | 0.988 | 104.1 | 0.012 | 0.982 | 75.9  | 0.018 | 0.981 | 88.7  | 0.019 |
| S24 | 0.978 | 97.3  | 0.022 | 0.981 | 116.4 | 0.019 | 0.981 | 116.4 | 0.019 | 0.986 | 134.3 | 0.014 | 0.982 | 108.3 | 0.018 | 0.978 | 103.9 | 0.022 |
| S25 | 0.975 | 92.9  | 0.025 | 0.991 | 106.9 | 0.009 | 0.991 | 106.9 | 0.009 | 0.984 | 102.3 | 0.016 | 0.978 | 81.5  | 0.022 | 0.98  | 88.6  | 0.02  |
| S26 | 0.993 | 100.6 | 0.007 | 0.993 | 122.2 | 0.007 | 0.993 | 122.2 | 0.007 | 0.994 | 129.6 | 0.006 | 0.985 | 93.4  | 0.015 | 0.992 | 103.8 | 0.008 |
| S27 | 0.973 | 75.2  | 0.027 | 0.996 | 92.8  | 0.004 | 0.996 | 92.8  | 0.004 | 0.993 | 96.7  | 0.007 | 0.986 | 70.8  | 0.014 | 0.982 | 79.1  | 0.018 |
| S28 | 0.983 | 87    | 0.017 | 0.859 | 157.8 | 0.141 | 0.859 | 157.8 | 0.141 | 0.995 | 127.3 | 0.005 | 0.992 | 94.9  | 0.008 | 0.981 | 89.8  | 0.019 |
| S29 | 0.981 | 79.8  | 0.019 | 0.984 | 92.9  | 0.016 | 0.984 | 92.9  | 0.016 | 0.981 | 91.3  | 0.019 | 0.972 | 72    | 0.028 | 0.976 | 79.1  | 0.024 |
| S30 | 0.973 | 107.8 | 0.027 | 0.987 | 130.3 | 0.013 | 0.987 | 130.3 | 0.013 | 0.989 | 158.4 | 0.011 | 0.973 | 105.7 | 0.027 | 0.977 | 115.4 | 0.023 |
| S31 | 0.933 | 63.1  | 0.067 | 0.966 | 79.4  | 0.034 | 0.966 | 79.4  | 0.034 | 0.986 | 91.3  | 0.014 | 0.98  | 64.1  | 0.02  | 0.968 | 69.5  | 0.032 |
| S32 | 0.936 | 57.3  | 0.064 | 0.967 | 61.4  | 0.033 | 0.967 | 61.4  | 0.033 | 0.974 | 71.8  | 0.026 | 0.973 | 51.5  | 0.027 | 0.96  | 57.9  | 0.04  |
| S33 | 0.972 | 95.1  | 0.028 | 0.975 | 106.7 | 0.025 | 0.975 | 106.7 | 0.025 | 0.975 | 111.7 | 0.025 | 0.968 | 84.6  | 0.032 | 0.967 | 87.7  | 0.033 |
| S34 | 0.975 | 96.1  | 0.025 | 0.989 | 121.7 | 0.011 | 0.989 | 121.7 | 0.011 | 0.993 | 134.5 | 0.007 | 0.987 | 97    | 0.013 | 0.98  | 101.8 | 0.02  |
| S35 | 0.978 | 92.4  | 0.022 | 0.967 | 116.9 | 0.033 | 0.967 | 116.9 | 0.033 | 0.974 | 72    | 0.026 | 0.99  | 82.7  | 0.01  | 0.98  | 95.7  | 0.02  |
| S36 | 0.979 | 83.9  | 0.021 | 0.984 | 107.8 | 0.016 | 0.984 | 107.8 | 0.016 | 0.978 | 109.1 | 0.022 | 0.983 | 87.9  | 0.017 | 0.978 | 88.8  | 0.022 |
| S37 | 0.946 | 87.8  | 0.054 | 0.979 | 127.9 | 0.021 | 0.979 | 127.9 | 0.021 | 0.974 | 117.4 | 0.026 | 0.967 | 98.5  | 0.033 | 0.885 | 94.4  | 0.115 |
| S38 | 0.955 | 82.6  | 0.045 | 0.981 | 108   | 0.019 | 0.981 | 108   | 0.019 | 0.979 | 112.2 | 0.021 | 0.976 | 89.3  | 0.024 | 0.965 | 90    | 0.035 |
| S39 | 0.981 | 69.9  | 0.019 | 0.992 | 97.4  | 0.008 | 0.992 | 97.4  | 0.008 | 0.994 | 94.3  | 0.006 | 0.991 | 70.9  | 0.009 | 0.989 | 75.5  | 0.011 |
| S40 | 0.982 | 73.7  | 0.018 | 0.99  | 101.8 | 0.01  | 0.99  | 101.8 | 0.01  | 0.994 | 102.1 | 0.006 | 0.992 | 75.2  | 0.008 | 0.986 | 79    | 0.014 |
| S41 | 0.935 | 101.3 | 0.065 | 0.97  | 145.2 | 0.03  | 0.97  | 145.2 | 0.03  | 0.96  | 143.7 | 0.04  | 0.962 | 107.1 | 0.038 | 0.939 | 104.3 | 0.061 |
| S42 | 0.938 | 101.7 | 0.062 | 0.959 | 138.9 | 0.041 | 0.959 | 138.9 | 0.041 | 0.958 | 127.8 | 0.042 | 0.964 | 100.4 | 0.036 | 0.944 | 103   | 0.056 |
| S43 | 0.959 | 70.1  | 0.041 | 0.977 | 92.9  | 0.023 | 0.977 | 92.9  | 0.023 | 0.973 | 85.3  | 0.027 | 0.959 | 68.7  | 0.041 | 0.96  | 76.9  | 0.04  |
| S44 | 0.992 | 100.3 | 0.008 | 0.993 | 128.6 | 0.007 | 0.993 | 128.6 | 0.007 | 0.989 | 126.7 | 0.011 | 0.985 | 94.7  | 0.015 | 0.991 | 102.9 | 0.009 |
| S45 | 0.94  | 91.9  | 0.06  | 0.971 | 108.7 | 0.029 | 0.971 | 108.7 | 0.029 | 0.96  | 106.4 | 0.04  | 0.919 | 87.7  | 0.081 | 0.929 | 91.3  | 0.071 |
| S46 | 0.959 | 106.5 | 0.041 | 0.986 | 143.9 | 0.014 | 0.986 | 143.9 | 0.014 | 0.979 | 140.1 | 0.021 | 0.978 | 112   | 0.022 | 0.967 | 102.7 | 0.033 |

|     |       |       |       |       |       |       |       |       |       |       |       |       |       |       |       |       |       |       |
|-----|-------|-------|-------|-------|-------|-------|-------|-------|-------|-------|-------|-------|-------|-------|-------|-------|-------|-------|
| S47 | 0.967 | 68.4  | 0.033 | 0.982 | 85    | 0.018 | 0.982 | 85    | 0.018 | 0.975 | 90.2  | 0.025 | 0.974 | 66.6  | 0.026 | 0.973 | 72.5  | 0.027 |
| S48 | 0.943 | 108   | 0.057 | 0.987 | 151   | 0.013 | 0.987 | 151   | 0.013 | 0.974 | 168.4 | 0.026 | 0.988 | 127.4 | 0.012 | 0.957 | 116.5 | 0.043 |
| S49 | 0.978 | 102.9 | 0.022 | 0.982 | 114.5 | 0.018 | 0.982 | 114.5 | 0.018 | 0.981 | 132.4 | 0.019 | 0.975 | 94.7  | 0.025 | 0.974 | 96.1  | 0.026 |
| S50 | 0.973 | 95.9  | 0.027 | 0.978 | 105.6 | 0.022 | 0.978 | 105.6 | 0.022 | 0.99  | 127.9 | 0.01  | 0.976 | 91.1  | 0.024 | 0.972 | 89.4  | 0.028 |
| S51 | 0.958 | 78.1  | 0.042 | 0.97  | 94.3  | 0.03  | 0.97  | 94.3  | 0.03  | 0.971 | 103.4 | 0.029 | 0.968 | 71.6  | 0.032 | 0.957 | 79.7  | 0.043 |
| S52 | 0.965 | 73.1  | 0.035 | 0.971 | 80.4  | 0.029 | 0.971 | 80.4  | 0.029 | 0.972 | 87.3  | 0.028 | 0.966 | 64.5  | 0.034 | 0.963 | 68.9  | 0.037 |
| S53 | 0.955 | 86.2  | 0.045 | 0.965 | 102.1 | 0.035 | 0.965 | 102.1 | 0.035 | 0.952 | 117.3 | 0.048 | 0.948 | 83    | 0.052 | 0.946 | 86.4  | 0.054 |
| S54 | 0.97  | 88.1  | 0.03  | 0.982 | 132   | 0.018 | 0.982 | 132   | 0.018 | 0.989 | 153.8 | 0.011 | 0.976 | 104.6 | 0.024 | 0.972 | 104   | 0.028 |
| S55 | 0.964 | 99.1  | 0.036 | 0.955 | 115.2 | 0.045 | 0.955 | 115.2 | 0.045 | 0.975 | 157.3 | 0.025 | 0.962 | 107.3 | 0.038 | 0.953 | 102.2 | 0.047 |
| S56 | 0.969 | 93.8  | 0.031 | 0.966 | 124.1 | 0.034 | 0.966 | 124.1 | 0.034 | 0.984 | 138.9 | 0.016 | 0.97  | 93.4  | 0.03  | 0.967 | 102.8 | 0.033 |
| S57 | 0.988 | 102.6 | 0.012 | 0.993 | 135   | 0.007 | 0.993 | 135   | 0.007 | 0.994 | 150.7 | 0.006 | 0.986 | 110.9 | 0.014 | 0.989 | 109.7 | 0.011 |
| S58 | 0.951 | 86.3  | 0.049 | 0.974 | 109.3 | 0.026 | 0.974 | 109.3 | 0.026 | 0.98  | 125.2 | 0.02  | 0.961 | 85.5  | 0.039 | 0.958 | 86.9  | 0.042 |
| S59 | 0.982 | 94.5  | 0.018 | 0.982 | 111.1 | 0.018 | 0.982 | 111.1 | 0.018 | 0.987 | 133.7 | 0.013 | 0.972 | 91.7  | 0.028 | 0.975 | 92.5  | 0.025 |
| S60 | 0.953 | 71.7  | 0.047 | 0.964 | 88    | 0.036 | 0.964 | 88    | 0.036 | 0.977 | 110.7 | 0.023 | 0.956 | 74.5  | 0.044 | 0.955 | 78.1  | 0.045 |
| RFP | 1     | 100   | 0     | 1     | 100   | 0     | 1     | 100   | 0     | 1     | 100   | 0     | 1     | 100   | 0     | 1     | 100   | 0     |



**Table S3** Reliability evaluation of RFP and 33 batches of CRP

| Reliability evaluation of RFP |       |       |       |       |       |       |       |       |       |
|-------------------------------|-------|-------|-------|-------|-------|-------|-------|-------|-------|
| Para.                         | Ur    | SRr   | Up    | PRp   | Para. | Ur    | SRr   | Up    | PRp   |
| S9                            | 0.073 | 0.927 | 0.076 | 0.924 | S41   | 0.067 | 0.933 | 0.07  | 0.93  |
| S15                           | 0.064 | 0.936 | 0.067 | 0.933 | S44   | 0.045 | 0.955 | 0.05  | 0.95  |
| S53                           | 0.162 | 0.838 | 0.163 | 0.837 | S56   | 0.067 | 0.933 | 0.07  | 0.93  |
| S58                           | 0.108 | 0.892 | 0.11  | 0.89  | S46   | 0.082 | 0.918 | 0.085 | 0.915 |
| S7                            | 0.053 | 0.947 | 0.057 | 0.943 | S42   | 0.128 | 0.872 | 0.13  | 0.87  |
| S45                           | 0.107 | 0.893 | 0.109 | 0.891 | S34   | 0.079 | 0.921 | 0.081 | 0.919 |
| S59                           | 0.041 | 0.959 | 0.046 | 0.954 | S55   | 0.069 | 0.931 | 0.072 | 0.928 |
| S28                           | 0.012 | 0.988 | 0.024 | 0.976 | S16   | 0.017 | 0.983 | 0.027 | 0.973 |
| S38                           | 0.155 | 0.845 | 0.157 | 0.843 | S4    | 0.012 | 0.988 | 0.024 | 0.976 |
| S50                           | 0.047 | 0.953 | 0.051 | 0.949 | S35   | 0.017 | 0.983 | 0.026 | 0.974 |
| S23                           | 0.02  | 0.98  | 0.029 | 0.971 | S49   | 0.039 | 0.961 | 0.044 | 0.956 |
| S25                           | 0.086 | 0.914 | 0.088 | 0.912 | S17   | 0.103 | 0.897 | 0.105 | 0.895 |
| S26                           | 0.02  | 0.98  | 0.028 | 0.972 | S37   | 0.126 | 0.874 | 0.128 | 0.872 |
| S36                           | 0.046 | 0.954 | 0.051 | 0.949 | S5    | 0.06  | 0.94  | 0.064 | 0.936 |
| S33                           | 0.027 | 0.973 | 0.034 | 0.966 | S18   | 0.057 | 0.943 | 0.06  | 0.94  |
| S2                            | 0.05  | 0.95  | 0.054 | 0.946 | S13   | 0.023 | 0.977 | 0.03  | 0.97  |
| S24                           | 0.045 | 0.955 | 0.049 | 0.951 | RFP   | 0.011 | 0.989 | 0.023 | 0.977 |
| S54                           | 0.045 | 0.955 | 0.049 | 0.951 |       |       |       |       |       |
